# Supplementary material for: Differential supercapacitor and Schottky diode behaviours in two new isostructural coordination polymers based on redox active metal ions
Source: Royal Society of Chemistry journal article supplement (doi:10.1039/d3ce00883e), 2023-01-01
Supplement: d3ce00883e1.pdf [file d3ce00883e1.pdf]

## **Differential Supercapacitor and Schottky Diode behaviours in Two New Isostructural Coordination Polymers Based on Redox Active Metal Ions**

Chhatan Das<sup>a</sup>, Subhrajyoti Debnath<sup>b</sup>, Vishwas D. Patel<sup>c</sup>, Dhritiman Gupta<sup>c</sup>, Anjan Banerjee<sup>b\*</sup> and

Partha Mahata<sup>a\*</sup>

<sup>a</sup>Department of Chemistry, Jadavpur University, Kolkata-700032, India. Email: [parthachem@gmail.com](mailto:parthachem@gmail.com)

<sup>b</sup>Department of Chemistry, Presidency University, 86/1, College Street, Kolkata-700073, West Bengal, India.

Email: [anjan.chem@presiuniv.ac.in](mailto:anjan.chem@presiuniv.ac.in)

<sup>c</sup>Department of Physics, School of Advanced Sciences, Vellore Institute of Technology, Vellore 632014, Tamil Nadu, India.

### **ELECTRONIC SUPPLEMENTARY INFORMATION**

---

\*Corresponding Authors, E-mail: [parthachem@gmail.com](mailto:parthachem@gmail.com), [anjan.chem@presiuniv.ac.in](mailto:anjan.chem@presiuniv.ac.in)

Table S1: The observed FT-IR bands for  $\{[\text{Mn}(\text{PDA})(4\text{-bpdb})(\text{H}_2\text{O})_2]\cdot 4\text{-bpdb}\}_n$ , **1**(Mn) and  $\{[\text{Fe}(\text{PDA})(4\text{-bpdb})(\text{H}_2\text{O})_2]\cdot 4\text{-bpdb}\}_n$ , **2**(Fe).

| Bands                                           | Absorption Wavenumbers (cm <sup>-1</sup> ) | Bands                                                          | Absorption Wavenumbers (cm <sup>-1</sup> ) |
|-------------------------------------------------|--------------------------------------------|----------------------------------------------------------------|--------------------------------------------|
| $\nu_{\text{str}}(\text{H}_2\text{O})$          | 3120(w)                                    | $\nu_{\text{sy. str}}(\text{carboxylate})$                     | 1302(s)                                    |
| $\nu_{\text{asy.str}}(\text{sp}_2 \text{ C-H})$ | 3052(m), 2924(m)                           | $\nu_{\text{str}}(\text{C-N})$                                 | 1230(s), 1195(w)                           |
| $\nu_{\text{asy.str}}(\text{sp}_3 \text{ C-H})$ | 2820(w)                                    | $\delta(\text{aromatic C-H})_{\text{in}}$<br>plane bending     | 1156(s), 1063(s),<br>1018(w), 989(m)       |
| $\nu_{\text{asy. str}}(\text{carboxylate})$     | 1604(s)                                    | $\delta(\text{aromatic C-H})_{\text{out}}$<br>of plane bending | 944(m), 873(m),<br>808(w)                  |
| $\nu_{\text{str}}(\text{C=N})$                  | 1540(s)                                    | $\delta(\text{carboxylate})_{\text{bending}}$                  | 717(s), 680(w)                             |
| $\nu_{\text{str}}(\text{C=C})$                  | 1498(s), 1416(m)                           | $\delta(\text{aromatic C=C})_{\text{out}}$<br>of plane bending | 617(s), 512(m)                             |

Table S2: Selected bond distances (Å) observed in  $\{[\text{Mn}(\text{PDA})(4\text{-bpdb})(\text{H}_2\text{O})_2] \cdot 4\text{-bpdb}\}_n$ , **1**(Mn) and  $\{[\text{Fe}(\text{PDA})(4\text{-bpdb})(\text{H}_2\text{O})_2] \cdot 4\text{-bpdb}\}_n$ , **2**(Fe).

| <b>1</b> (Mn) |              | <b>2</b> (Fe) |              |
|---------------|--------------|---------------|--------------|
| Bond          | Distances, Å | Bond          | Distances, Å |
| Mn(1)-O(1)    | 2.148(2)     | Fe(1)-O(1)    | 2.1005(18)   |
| Mn(1)-O(1)#1  | 2.148(2)     | Fe(1)-O(1)#1  | 2.1005(18)   |
| Mn(1)-O(3)    | 2.215(3)     | Fe(1)-O(3)#1  | 2.172(2)     |
| Mn(1)-O(3)#1  | 2.215(3)     | Fe(1)-O(3)    | 2.173(2)     |
| Mn(1)-N(1)#1  | 2.295(3)     | Fe(1)-N(1)#1  | 2.226(2)     |
| Mn(1)-N(1)    | 2.295(3)     | Fe(1)-N(1)    | 2.226(2)     |

Symmetry transformations used to generate equivalent atoms: #1  $-x+1, -y+1, -z+1$ .

Table S3: Selected bond angles observed in  $\{[\text{Mn}(\text{PDA})(4\text{-bpdb})(\text{H}_2\text{O})_2]\cdot 4\text{-bpdb}\}_n$ , **1**(Mn) and  $\{[\text{Fe}(\text{PDA})(4\text{-bpdb})(\text{H}_2\text{O})_2]\cdot 4\text{-bpdb}\}_n$ , **2**(Fe).

| Mn(1)               |           | Fe(2)               |           |
|---------------------|-----------|---------------------|-----------|
| Angle               | Amplitude | Angle               | Amplitude |
| O(1)#1-Mn(1)-O(1)   | 180.0     | O(1)-Fe(1)-O(1)#1   | 180.0     |
| O(1)#1-Mn(1)-O(3)   | 92.51(10) | O(1)-Fe(1)-O(3)#1   | 91.31(8)  |
| O(1)-Mn(1)-O(3)     | 87.49(10) | O(1)#1-Fe(1)-O(3)#1 | 88.69(8)  |
| O(1)#1-Mn(1)-O(3)#1 | 87.49(10) | O(1)-Fe(1)-O(3)     | 88.69(8)  |
| O(1)-Mn(1)-O(3)#1   | 92.51(10) | O(1)#1-Fe(1)-O(3)   | 91.31(8)  |
| O(3)-Mn(1)-O(3)#1   | 180.0     | O(3)#1-Fe(1)-O(3)   | 180.0     |
| O(1)#1-Mn(1)-N(1)#1 | 87.72(9)  | O(1)-Fe(1)-N(1)#1   | 91.67(7)  |
| O(1)-Mn(1)-N(1)#1   | 92.28(9)  | O(1)#1-Fe(1)-N(1)#1 | 88.33(7)  |
| O(3)-Mn(1)-N(1)#1   | 88.48(10) | O(3)#1-Fe(1)-N(1)#1 | 90.32(8)  |
| O(3)#1-Mn(1)-N(1)#1 | 91.52(10) | O(3)-Fe(1)-N(1)#1   | 89.68(8)  |
| O(1)#1-Mn(1)-N(1)   | 92.28(9)  | O(1)-Fe(1)-N(1)     | 88.33(7)  |
| O(1)-Mn(1)-N(1)     | 87.73(9)  | O(1)#1-Fe(1)-N(1)   | 91.67(7)  |
| O(3)-Mn(1)-N(1)     | 91.52(10) | O(3)#1-Fe(1)-N(1)   | 89.68(8)  |
| O(3)#1-Mn(1)-N(1)   | 88.48(10) | O(3)-Fe(1)-N(1)     | 90.32(8)  |
| N(1)#1-Mn(1)-N(1)   | 180.0     | N(1)#1-Fe(1)-N(1)   | 180.0     |

Symmetry transformations used to generate equivalent atoms: #1 -x+1,-y+1,-z+1.

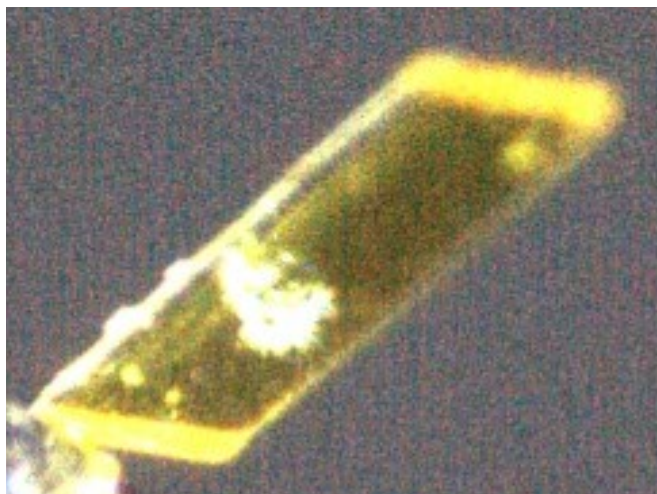

Fig. S1a: Yellow coloured parallelogram shaped crystal structure of  $\{[\text{Mn}(\text{PDA})(4\text{-bpdb})(\text{H}_2\text{O})_2]\cdot 4\text{-bpdb}\}_n$ , **1**(Mn).

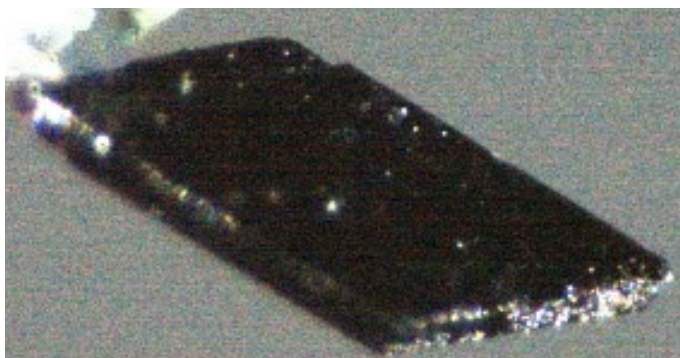

Fig. S1b: Violet coloured parallelogram shaped crystal image of  $\{[\text{Fe}(\text{PDA})(4\text{-bpdb})(\text{H}_2\text{O})_2]\cdot 4\text{-bpdb}\}_n$ , **2**(Fe).

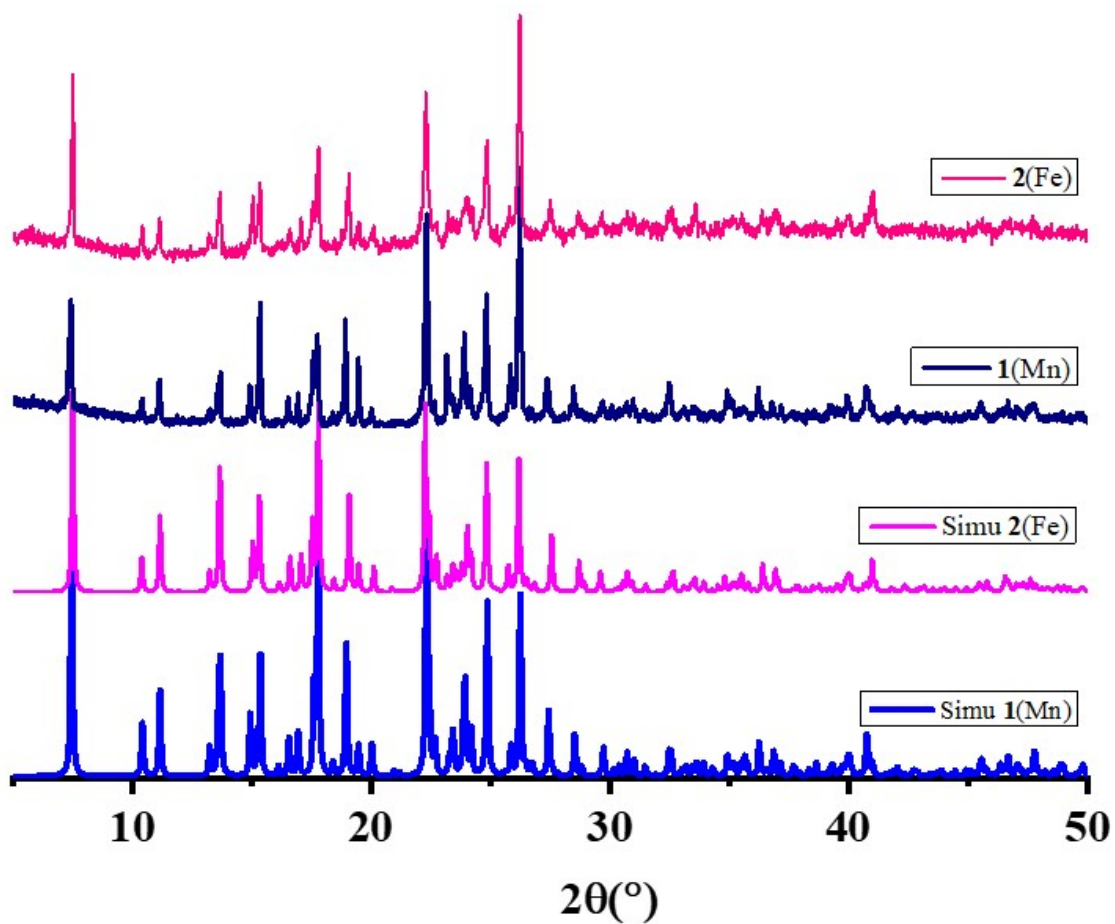

Fig. S2: PXRD ( $\text{CuK}\alpha$ ) patterns of  $\{[\text{Mn}(\text{PDA})(4\text{-bpdb})(\text{H}_2\text{O})_2]\cdot 4\text{-bpdb}\}_n$ ,  $1(\text{Mn})$  and  $\{[\text{Fe}(\text{PDA})(4\text{-bpdb})(\text{H}_2\text{O})_2]\cdot 4\text{-bpdb}\}_n$ ,  $2(\text{Fe})$ .

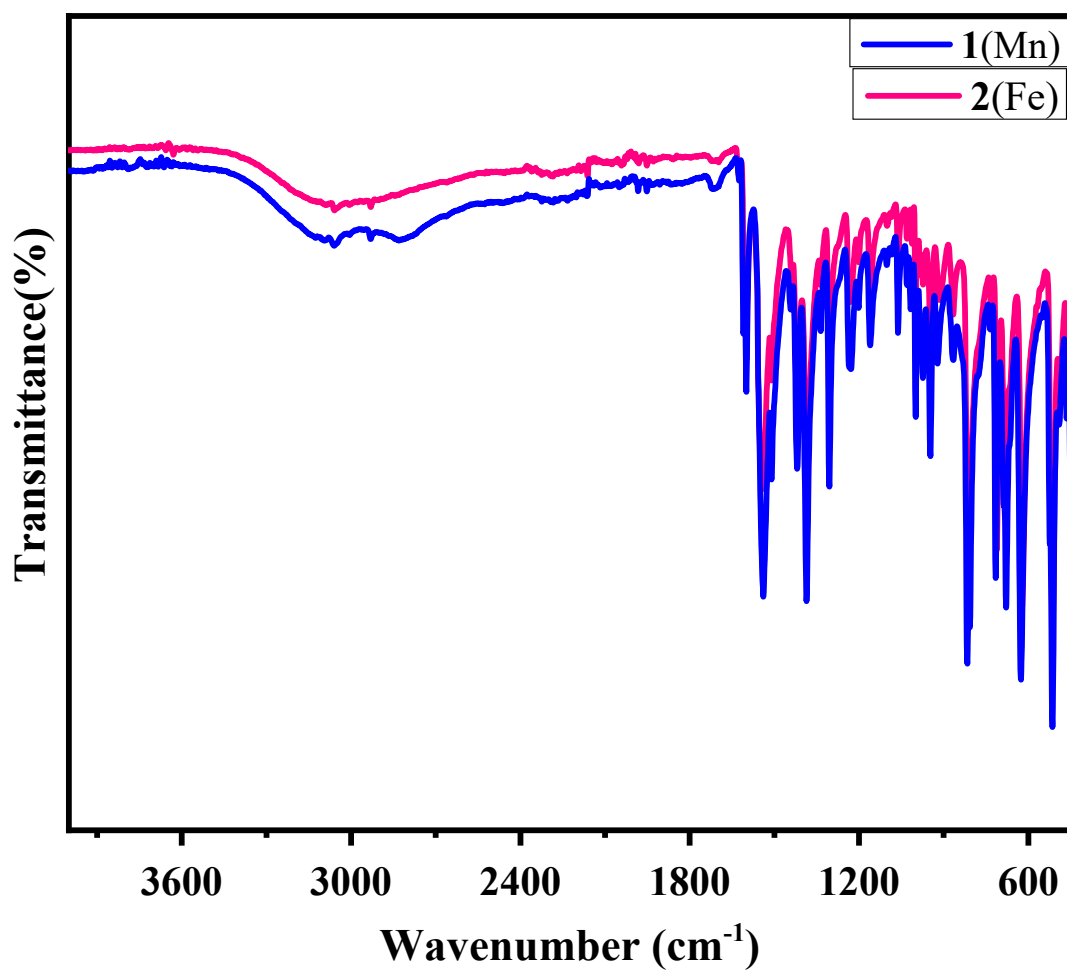

Fig. S3: FT-IR spectrum of  $\{[\text{Mn}(\text{PDA})(4\text{-bpdb})(\text{H}_2\text{O})_2] \cdot 4\text{-bpdb}\}_n$ , **1(Mn)** and  $\{[\text{Fe}(\text{PDA})(4\text{-bpdb})(\text{H}_2\text{O})_2] \cdot 4\text{-bpdb}\}_n$ , **2(Fe)**.

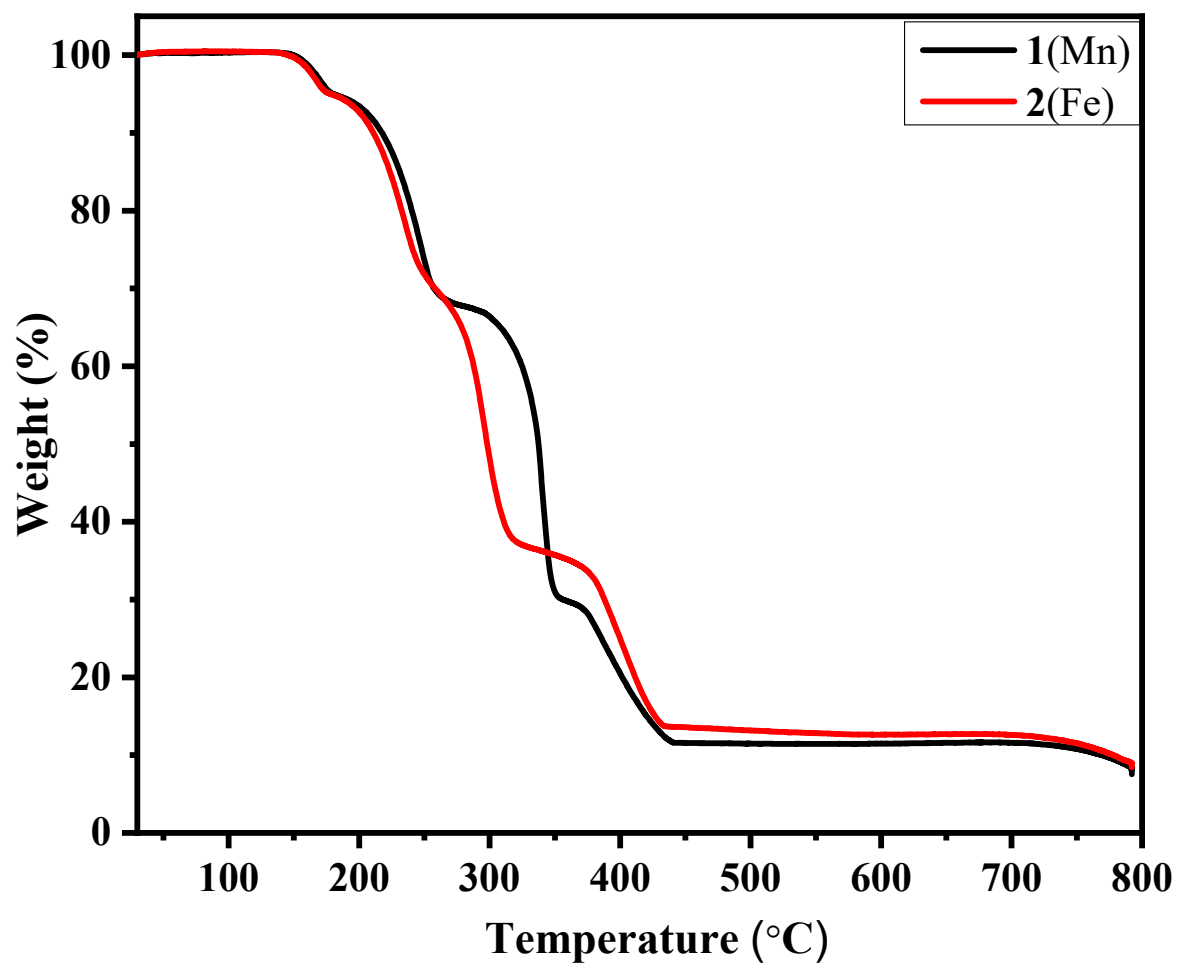

Fig. S4: Thermogravimetric analysis (TGA) of  $\{[\text{Mn}(\text{PDA})(4\text{-bpdb})(\text{H}_2\text{O})_2] \cdot 4\text{-bpdb}\}_n$ , **1(Mn)** and  $\{[\text{Fe}(\text{PDA})(4\text{-bpdb})(\text{H}_2\text{O})_2] \cdot 4\text{-bpdb}\}_n$ , **2(Fe)** in nitrogen atmosphere.



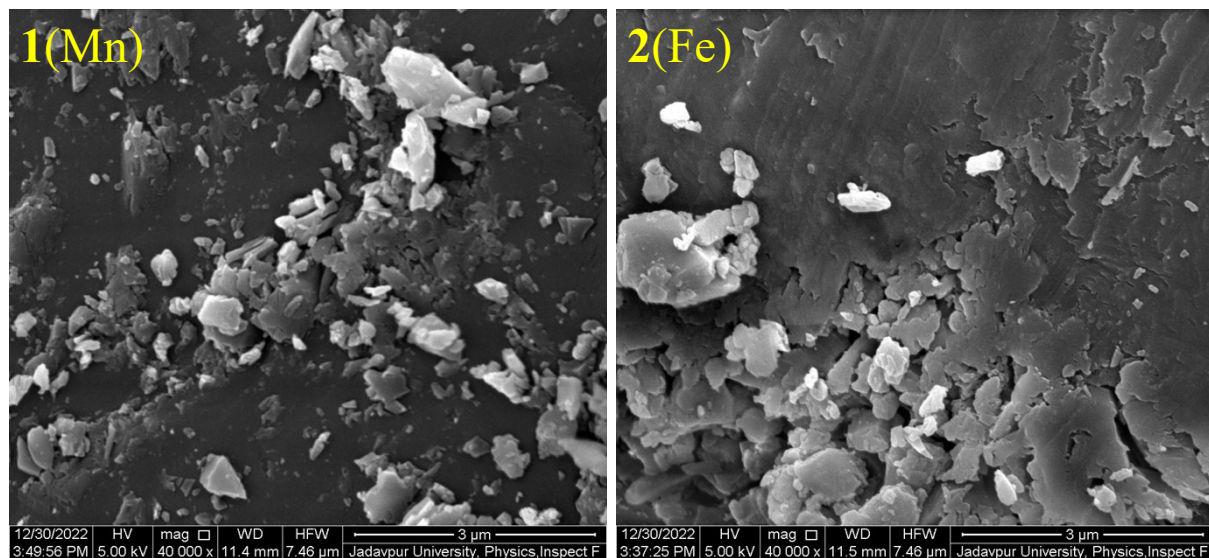

Figure S5: SEM images of  $\{[\text{Mn}(\text{PDA})(4\text{-bpdb})(\text{H}_2\text{O})_2] \cdot 4\text{-bpdb}\}_n$ , **1(Mn)** and  $\{[\text{Fe}(\text{PDA})(4\text{-bpdb})(\text{H}_2\text{O})_2] \cdot 4\text{-bpdb}\}_n$ , **2(Fe)**.

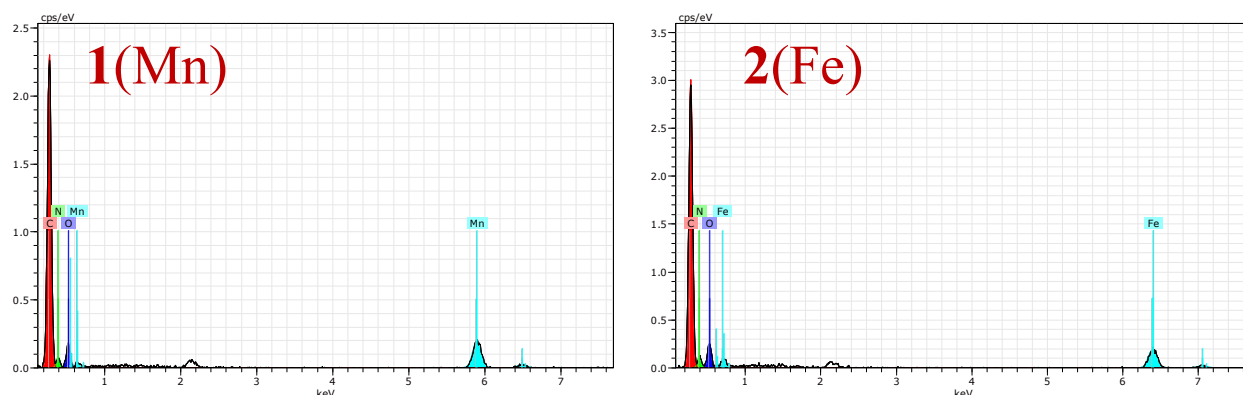

Figure S6: Representative EDX plot of  $\{[\text{Mn}(\text{PDA})(4\text{-bpdb})(\text{H}_2\text{O})_2]\cdot 4\text{-bpdb}\}_n$ , **1(Mn)** and  $\{[\text{Fe}(\text{PDA})(4\text{-bpdb})(\text{H}_2\text{O})_2]\cdot 4\text{-bpdb}\}_n$ , **2(Fe)**. Note the presence of Mn and Fe.

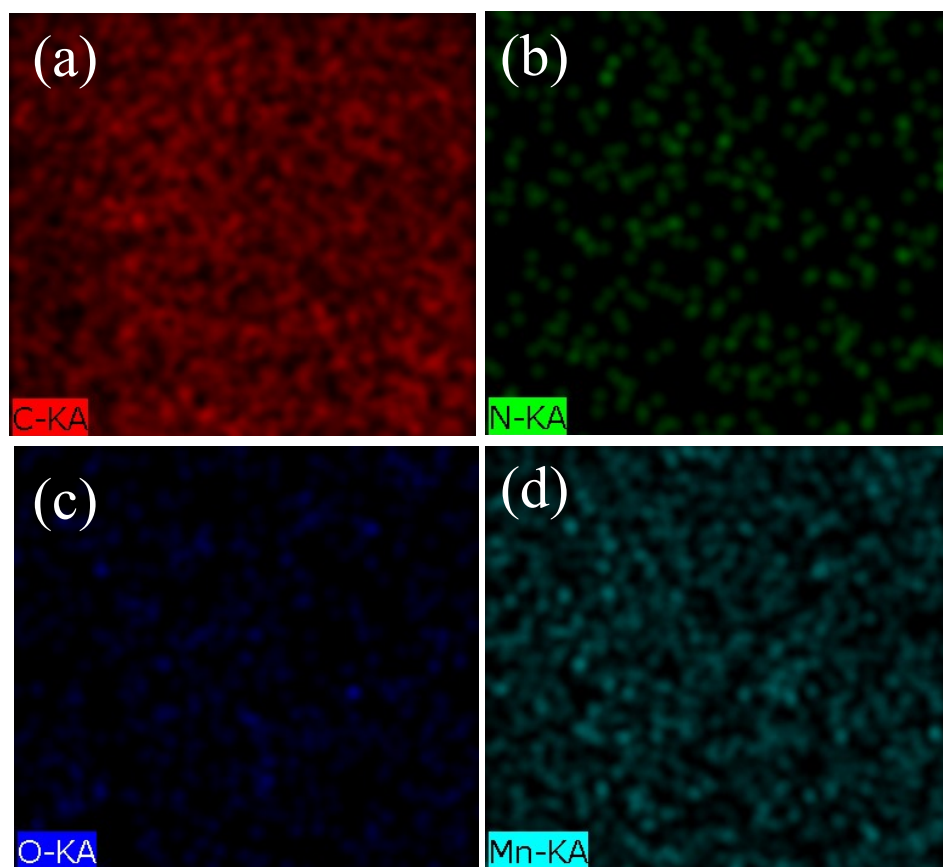

Figure S7. Elemental mapping images of  $\{[\text{Mn}(\text{PDA})(4\text{-bpdb})(\text{H}_2\text{O})_2] \cdot 4\text{-bpdb}\}_n$ , **1**(Mn) for (a) C-KA and (b) N-KA, (c) O-KA and (d) Mn-KA.

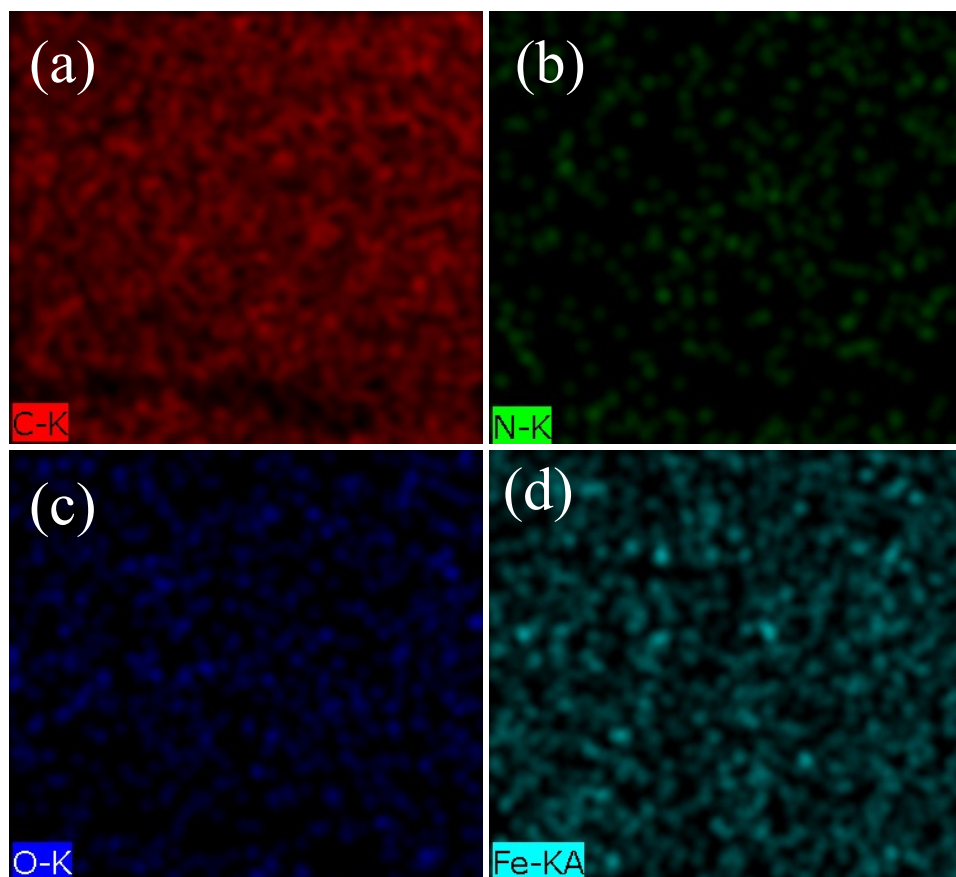

Figure S8. Elemental mapping images of  $\{[\text{Fe}(\text{PDA})(4\text{-bpdb})(\text{H}_2\text{O})_2] \cdot 4\text{-bpdb}\}_n \cdot 2(\text{Fe})$  for (a) C-K and (b) N-K, (c) O-K and (d) Fe-KA.

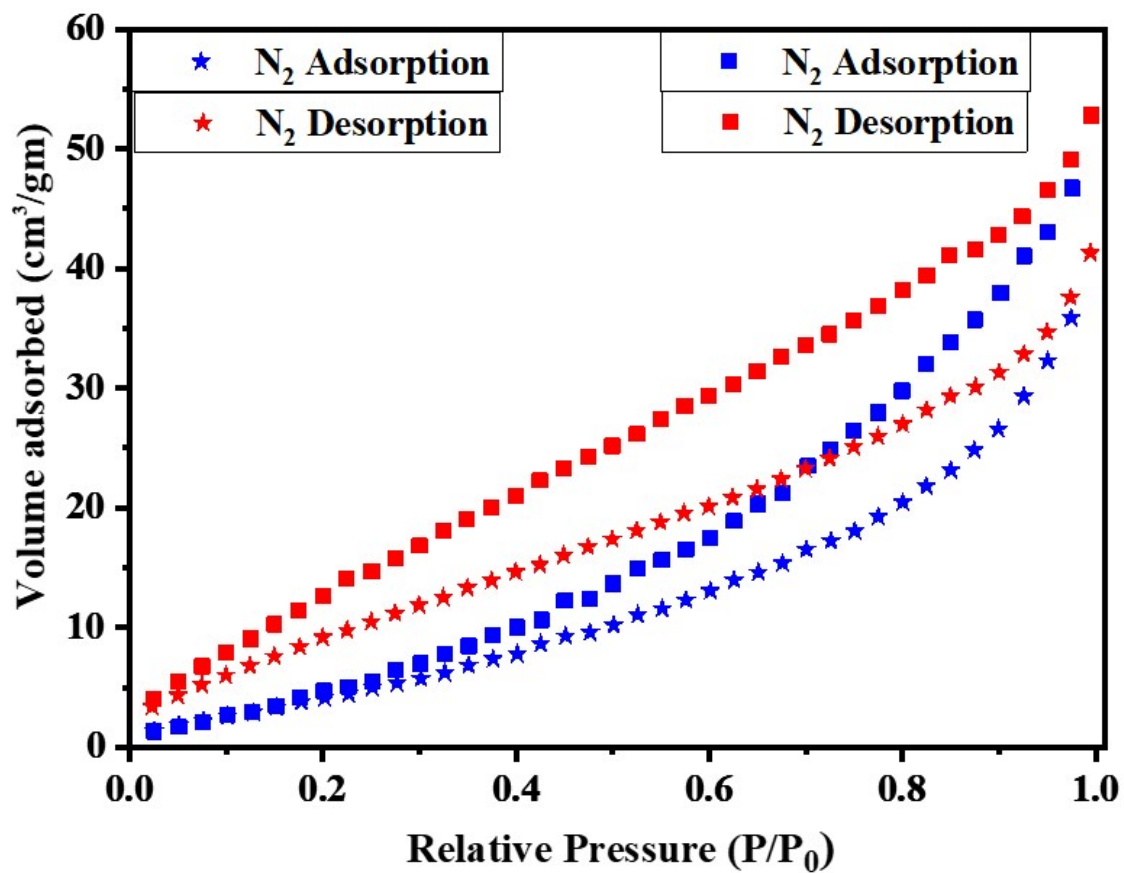

Fig. S9: N<sub>2</sub> adsorption (at 77 K) isotherms of 1(Mn) and 2(Fe), squares represent the adsorption(blue) and desorption(red) by 1(Mn) and stars represent the adsorption(blue) and desorption(red) by 2(Fe), respectively.

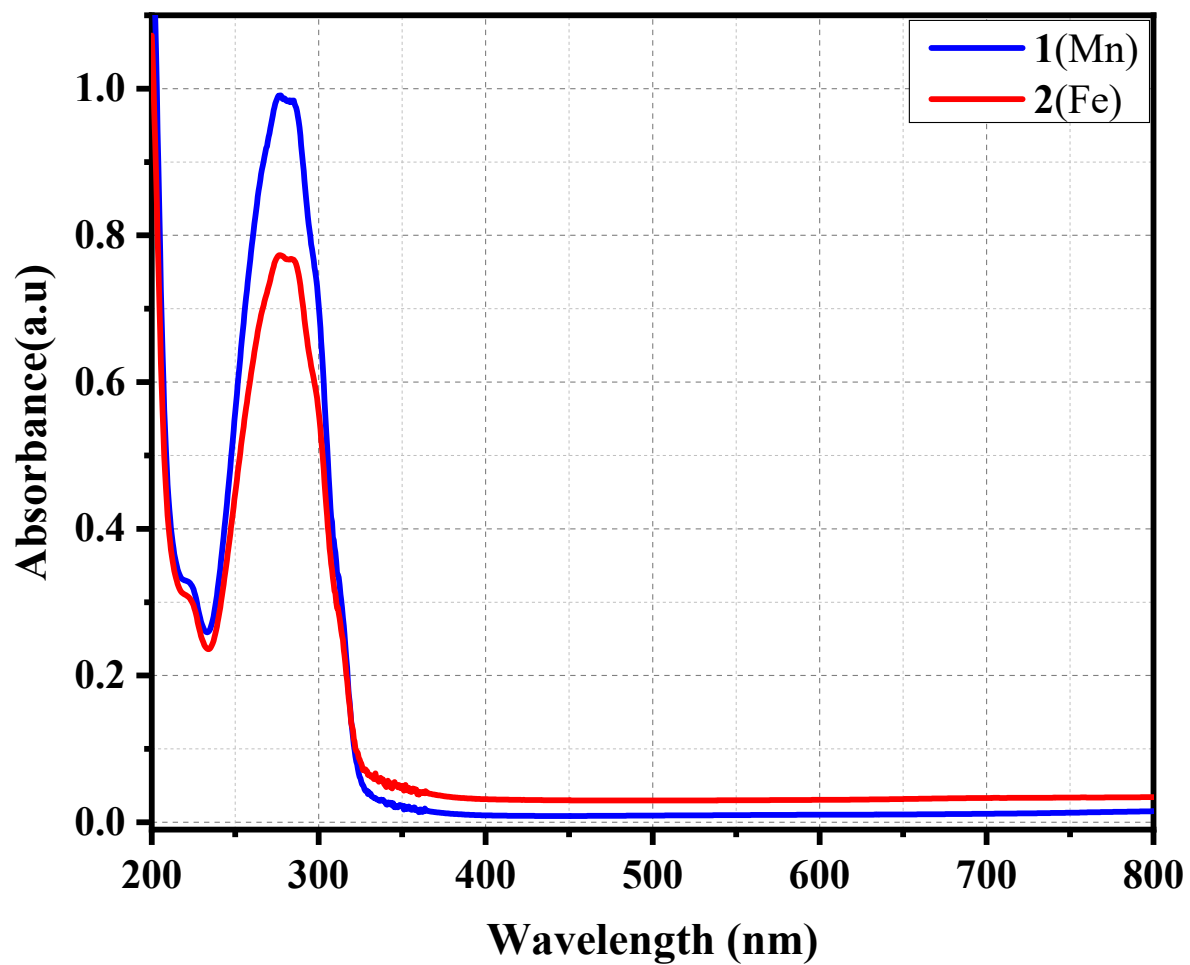

Fig. S10: Absorption spectra of **1**(Mn) and **2**(Fe) in aqueous medium.

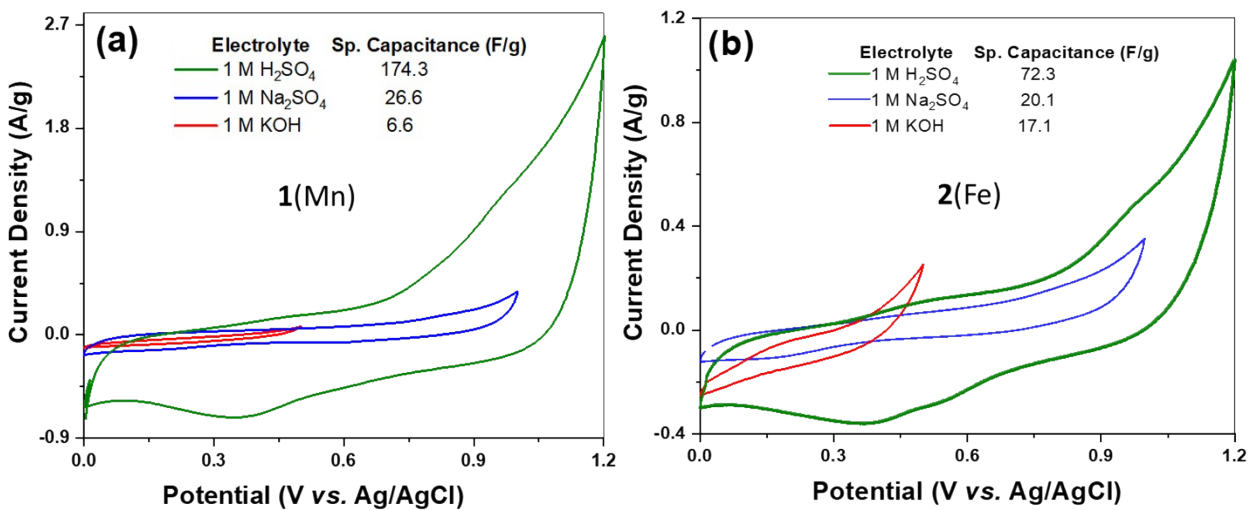

Fig. S11: Comparative CV profiles of (a) **1(Mn)** and (b) **2(Fe)** at 5 mV/s scan rate under 1 M H<sub>2</sub>SO<sub>4</sub>, 1 M Na<sub>2</sub>SO<sub>4</sub> and 1 M KOH electrolyte mediums.

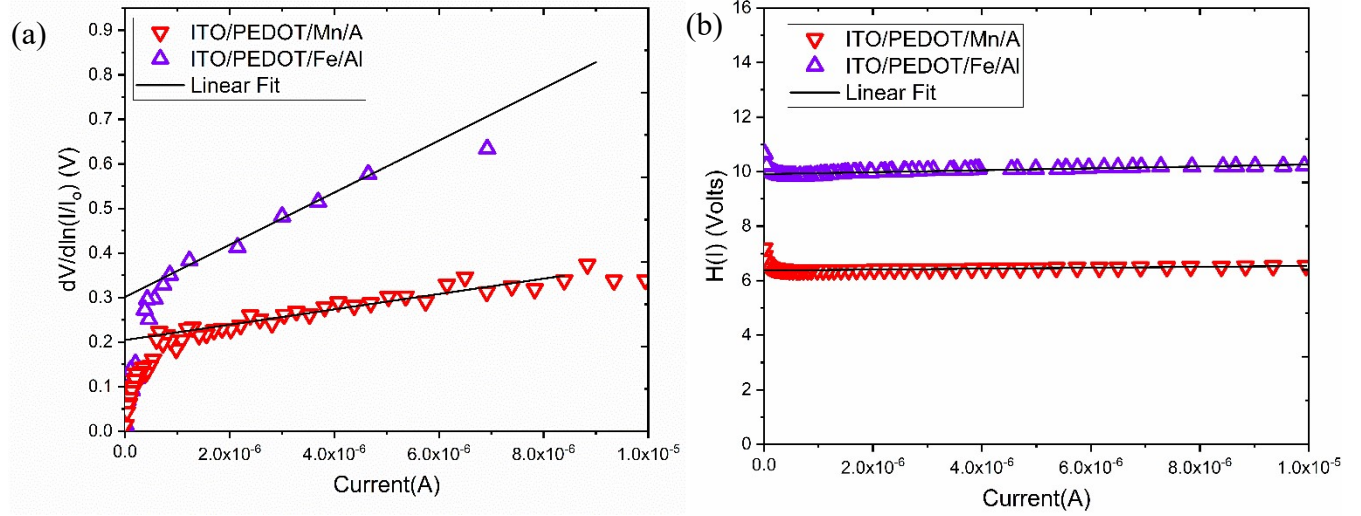

Fig. S12: (a) Plot of  $\frac{dV}{d\ln\left(\frac{I}{I_0}\right)}$  versus  $I$  and (b)  $H(I)$  vs.  $I$  for the devices *ITO/PEDOT/Fe/Al* and *ITO/PEDOT/Mn/Al* in dark condition

Table S4

| Device Structure | Series resistance $R_s$ (K $\Omega$ )                   |                    | Ideality factor ( $n$ ) | Barrier height $\phi_B$ (eV) |
|------------------|---------------------------------------------------------|--------------------|-------------------------|------------------------------|
|                  | From $\frac{dV}{d\left(\ln\frac{I}{I_0}\right)}$ vs $I$ | From $H(I)$ vs $I$ |                         |                              |
| ITO/PEDOT/Mn/Al  | $17.22 \pm 1.22$                                        | $16.60 \pm 0.5$    | 7.75                    | 0.821                        |
| ITO/PEDOT/Fe/Al  | $58.51 \pm 4.04$                                        | $34.99 \pm 1.50$   | 11.66                   | 0.849                        |
